# Supplementary material for: Dopamine-induced changes to thalamic GABA concentration in impulsive Parkinson disease patients
Source: PubMed Central journal article supplement (PMC8983736; doi:10.1038/s41531-022-00298-8), 2022-04-05
Supplement: 41531_2022_298_MOESM1_ESM.pdf [file 41531_2022_298_MOESM1_ESM.pdf]

## SUPPLEMENTARY MATERIAL

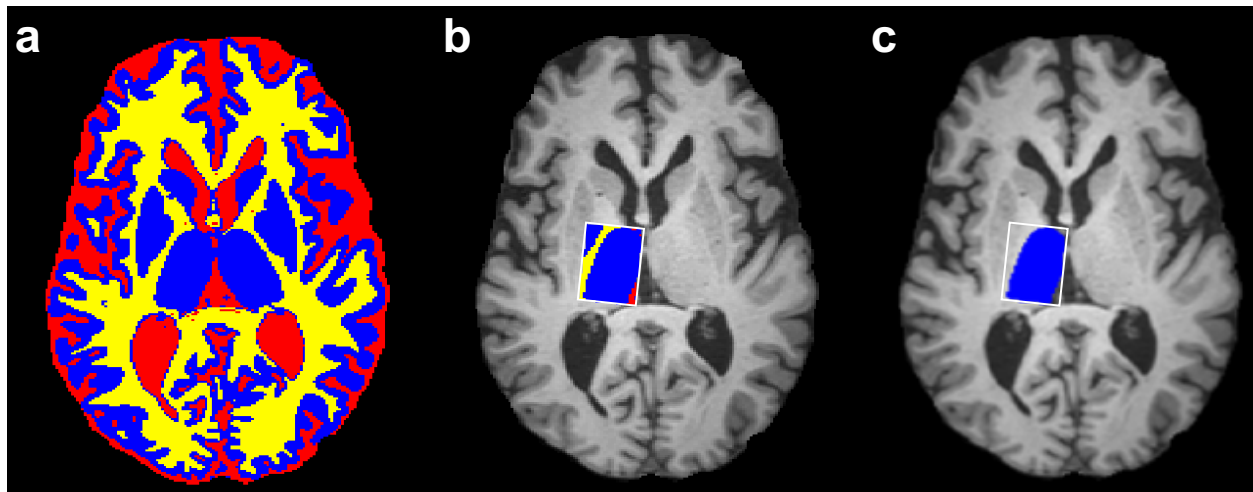

**Supplementary Fig. 1** Tissue segmentation for compartment correction. **a** Grey matter (GM, blue), white matter (WM, yellow), and cerebral spinal fluid (CSF, red) tissue segmentation was obtained by merging the results from FSL FAST and FIRST. **b** The MRS voxel mask was then applied to the tissue segmentation to determine the tissue voxel fractions for GM, WM and CSF. **c** Voxel fraction corresponding to the thalamus.
